# Supplementary material
Source: MDPI journal article supplement (https://www.mdpi.com/2073-4441/15/19/3487)
Supplement: s1 [file s1]

Supplementary S1: List of Machine Learning models covered in this study

| Models                              | Number of repetitions | Number of Articles | Class        | Type                      |
|-------------------------------------|-----------------------|--------------------|--------------|---------------------------|
| Adaboost                            | 10                    | 6                  | Supervised   | Classification            |
| Adaptive Neuro Fuzzy Inference      | 28                    | 28                 | Supervised   | Regression                |
| Agglomerative Clustering            | 1                     | 1                  | Unsupervised | Clustering                |
| Artificial Neural Network           | 137                   | 126                | Supervised   | Regression/Classification |
| Autoencoders                        | 1                     | 1                  | Unsupervised | Dimensionality reduction  |
| Bagging                             | 5                     | 5                  | Supervised   | Regression/Classification |
| Bayesian Additive Regression Tree   | 1                     | 1                  | Supervised   | Regression                |
| Boltzmann Machine                   | 1                     | 1                  | Unsupervised | Dimensionality reduction  |
| C4 5                                | 1                     | 1                  | Supervised   | Classification            |
| Catboost                            | 10                    | 3                  | Supervised   | Regression/Classification |
| Convolutional Neural Network        | 5                     | 5                  | Supervised   | Classification            |
| Cubist                              | 5                     | 2                  | Supervised   | Regression                |
| Decision Tree                       | 35                    | 30                 | Supervised   | Regression/Classification |
| Decision Tree Regression            | 1                     | 1                  | Supervised   | Regression                |
| Deep Belief Network                 | 2                     | 1                  | Supervised   | Regression/Classification |
| Deep Neural Network                 | 9                     | 9                  | Supervised   | Regression/Classification |
| Echo State Network                  | 1                     | 1                  | Supervised   | Regression                |
| Ensemble Learning                   | 2                     | 2                  | Supervised   | Regression/Classification |
| Expectation Maximization Clustering | 1                     | 1                  | Unsupervised | Clustering                |
| Extreme Learning Machine            | 11                    | 8                  | Supervised   | Regression/Classification |
| Factor Analysis                     | 3                     | 3                  | Unsupervised | Dimensionality reduction  |
| Feed Forward Neural Network         | 11                    | 10                 | Supervised   | Classification            |
| Fuzzy C Means                       | 3                     | 3                  | Unsupervised | Clustering                |
| Fuzzy Logic                         | 42                    | 23                 | Supervised   | Regression/Classification |
| Gated Recurrent Unit                | 1                     | 1                  | Supervised   | Regression                |
| Gaussian Mixture Model              | 2                     | 2                  | Unsupervised | Clustering                |
| Gaussian Process                    | 13                    | 11                 | Supervised   | Regression                |
| Gaussian Process Regression         | 11                    | 9                  | Supervised   | Regression                |
| Gradient Boosting                   | 29                    | 25                 | Supervised   | Regression/Classification |
| Graph Convolutional Network         | 1                     | 1                  | Supervised   | Classification            |
| Hidden Markov Model                 | 1                     | 1                  | Supervised   | Classification            |
| Hierarchical Clustering             | 1                     | 1                  | Unsupervised | Clustering                |
| K Means Clustering                  | 3                     | 3                  | Unsupervised | Clustering                |
| K Nearest Neighbor                  | 13                    | 12                 | Supervised   | Classification            |
| Lasso Regression                    | 4                     | 4                  | Supervised   | Regression                |
| Light Gradient Boosting Machine     | 2                     | 2                  | Supervised   | Regression/Classification |
| Lightgbm                            | 7                     | 4                  | Supervised   | Regression/Classification |
| Linear Discriminant Analysis        | 1                     | 1                  | Supervised   | Classification            |
| Linear Regression                   | 47                    | 35                 | Supervised   | Regression                |

|                                                   |    |    |              |                           |
|---------------------------------------------------|----|----|--------------|---------------------------|
| Logistic Regression                               | 12 | 11 | Supervised   | Classification            |
| Long Short Term Memory                            | 16 | 16 | Supervised   | Regression                |
| Mean Shift Clustering                             | 1  | 1  | Unsupervised | Clustering                |
| Moving Average                                    | 5  | 5  | Unsupervised | Dimensionality reduction  |
| Multi Layer Perceptron                            | 3  | 3  | Supervised   | Classification            |
| Multivariate Adaptive Regression Splines          | 2  | 2  | Supervised   | Regression                |
| Naive Bayes                                       | 2  | 2  | Supervised   | Classification            |
| Partial Least Squares                             | 5  | 5  | Supervised   | Regression                |
| Partial Least Squares Regression                  | 1  | 1  | Supervised   | Regression                |
| Partitioning Around Medoids                       | 1  | 1  | Unsupervised | Clustering                |
| Polynomial Regression                             | 3  | 3  | Supervised   | Regression                |
| Principal Component Analysis                      | 14 | 14 | Unsupervised | Dimensionality reduction  |
| Quantile Regression Neural Network                | 1  | 1  | Supervised   | Regression                |
| Radial Basis Function Neural Network              | 6  | 6  | Supervised   | Regression/Classification |
| Random Forest                                     | 90 | 77 | Supervised   | Regression/Classification |
| Random Forest Regression                          | 5  | 4  | Supervised   | Regression                |
| Recurrent Neural Network                          | 12 | 11 | Supervised   | Regression                |
| Regression Tree                                   | 10 | 7  | Supervised   | Regression                |
| Restricted Boltzmann Machine                      | 1  | 1  | Unsupervised | Dimensionality reduction  |
| Ridge Regression                                  | 5  | 4  | Supervised   | Regression                |
| Seasonal Autoregressive Integrated Moving Average | 1  | 1  | Supervised   | Regression                |
| Self Organizing Map                               | 4  | 4  | Unsupervised | Clustering                |
| Spectral Clustering                               | 1  | 1  | Unsupervised | Clustering                |
| Stacking                                          | 4  | 3  | Supervised   | Regression/Classification |
| Stepwise Regression                               | 2  | 2  | Supervised   | Regression                |
| Stochastic Gradient Descent                       | 1  | 1  | Supervised   | Regression/Classification |
| Support Vector Machine                            | 60 | 52 | Supervised   | Regression/Classification |
| Xgboost                                           | 20 | 9  | Supervised   | Regression/Classification |

---
